# Supplementary material
Source: PubMed Central journal article supplement (PMC7671020)
Supplement: JPPT_25_8_Wiltrout_S_Table_1.pdf [file JPPT_25_8_Wiltrout_S_Table_1.pdf]

**Table S1. Nephrotoxic Drug List**

|                              |
|------------------------------|
| Acyclovir                    |
| Amphotericin B liposomal*    |
| Amphotericin B conventional* |
| Aminoglycosides              |
| ACE inhibitors               |
| Carboplatin                  |
| Cidofovir*                   |
| Cisplatin                    |
| Colistimethate IV            |
| Cyclosporine                 |
| Cytarabine                   |
| Dapsone                      |
| Epinephrine injectable†      |
| Foscarnet                    |
| IV contrast*                 |
| Ganciclovir                  |
| NSAIDs                       |
| Ifosfamide                   |
| Lithium                      |
| Mesalamine                   |
| Methotrexate                 |
| Mitomycin                    |
| Norepinephrine†              |
| Oxacillin                    |
| Pamidronate                  |
| Pentamidine                  |
| Piperacillin/tazobactam      |
| Piperacillin                 |
| Sirolimus                    |
| Sulfasalazine                |
| Tacrolimus                   |
| Tenofovir                    |
| Ticarcillin/clavulanic acid  |
| Topiramate                   |
| Valacyclovir                 |
| Valganciclovir               |
| Vancomycin                   |
| Vasopressin†                 |
| Zoledronic acid              |
| Zonisamide                   |

ACE, *Angiotensin-converting enzyme*

\* Count for 7 days after administration.

† Administration of these medications may indicate that the patient is at increased risk of acute kidney injury
