# Supplementary material
Source: PubMed Central journal article supplement (PMC7671020)
Supplement: JPPT_25_8_Wiltrout_S_Table_3.pdf [file JPPT_25_8_Wiltrout_S_Table_3.pdf]

**Table S3.** Anticoagulant/Antiplatelet/Thrombolytic Drug List

Alteplase

Aspirin

Clopidogrel

Dipyridamole

Direct-acting oral anticoagulants (Apixaban, Dabigatran, Edoxaban, Rivaroxaban)

Direct thrombin inhibitors (Argatroban, Bivalirudin)

Fondaparinux

Low-molecular-weight heparin (Dalteparin, Enoxaparin)

Non-steroidal anti-inflammatory drugs (Celecoxib, Ibuprofen, Indomethacin, Ketorolac, Naproxen)

Unfractionated heparin

---
